# Supplementary material
Source: publisher site journal article supplement (https://www.dovepress.com/article/608045)
Supplement: Supplementary file 1 [file 608045%20Supplementary%20Figure%201.docx]

**Supplementary Figure 1**

Confidential for Research Purposes Only

**Section A:** Socio-demographic Characteristics

Please tick (✓) the appropriate response or fill in the blank.

1. Sex: ☐ Male ☐ Female

2. Age (in years): ____

3. Marital status: ☐ Single ☐ Married ☐ Divorced ☐ Widowed

4. Religion: ☐ Christianity ☐ Islam ☐ Traditional ☐Others (specify) ____

5. Educational level:

☐ No formal education

☐ Primary

☐ Secondary

☐ Tertiary

6. Occupation: ☐ Civil servant ☐ Trader ☐ Artisan ☐ Student ☐ Unemployed ☐Others ____

7. Monthly income (₦):

☐< ₦50,000

☐ ₦50,000–₦99,999

☐ ₦100,000–₦199,999

☐ ₦200,000 and above

8. Local Government Area: ☐Akure South ☐Akure North

9. Duration of residence in Akure: ____ years

**Section B:** Awareness and Knowledge of Dental Services

1. Have you ever heard about dental services or dental clinics? ☐ Yes ☐ No

2. Source(s) of information (you may tick more than one):

☐ TV/Radio ☐ Health workers ☐ Friends/Relatives ☐ Social media ☐ School ☐Others ___

3. Are you aware of any dental clinic within Akure Metropolis? ☐ Yes ☐ No

4. Which of the following dental services do you know?

☐ Tooth extraction ☐ Filling ☐ Scaling and polishing ☐ Denture fabrication ☐ Teeth whitening ☐Others ___

5. Do you believe dental check-up is important even without pain? ☐ Yes ☐ No ☐Not sure

6. How often should one visit a dentist for check-up?

☐ Every 6 months ☐Once a year ☐ Only when in pain ☐ Don’t know

**Section C:** Utilization of Dental Services

1. Have you ever visited a dentist before? ☐ Yes ☐ No

2. If yes, when was your last visit?

☐ Less than 6 months ago ☐ 6–12 months ago ☐ Over 1 year ago

3. What was the main reason for your last visit?

☐ Toothache ☐ Gum problem ☐ Routine check-up ☐ Cosmetic purpose ☐ Others___

4. How many times have you visited a dentist in your lifetime?

☐Once☐ 2–3 times ☐ More than 3 times ☐ Never

5. Where did you receive dental treatment?

☐ Government hospital ☐ Private dental clinic ☐ Teaching hospital ☐Others ___

6. How would you rate the cost of the dental services received?

☐ Affordable ☐ Expensive ☐ Very expensive

7. Were you satisfied with the service? ☐ Yes ☐ No ☐Partly satisfied

**Section D:** Perceived Barriers to Utilization of Dental Services

Please indicate how much you agree with the following statements:

(1 = Strongly Disagree, 2 = Disagree, 3 = Neutral, 4 = Agree, 5 = Strongly Agree)

**Barrier Statement 1 2 3 4 5**

1. Dental services are too expensive. ☐ ☐ ☐ ☐ ☐

2. Dental clinics are too far from where I live. ☐ ☐ ☐ ☐ ☐

3. Long waiting time discourages me. ☐ ☐ ☐ ☐ ☐

4. I am afraid of dental pain or injections. ☐ ☐ ☐ ☐ ☐

5. I only visit a dentist when I have severe pain. ☐ ☐ ☐ ☐ ☐

6. I prefer using traditional or home remedies. ☐ ☐ ☐ ☐ ☐

7. I do not know where dental clinics are located. ☐ ☐ ☐ ☐ ☐

8. Dentists are unfriendly or harsh. ☐ ☐ ☐ ☐ ☐

9. I think dental treatment is not necessary. ☐ ☐ ☐ ☐ ☐

10. My religious or cultural beliefs discourage

dental visits. ☐ ☐ ☐ ☐ ☐

**Section E:** Community Suggestions and Willingness to Utilize Services

1. What can the government do to make dental services easier to access?

2. Would you attend regular dental check-ups if services were free or subsidized? ☐ Yes ☐ No

3. Would you encourage your family or friends to visit a dentist regularly? ☐ Yes ☐ No

4. What do you think is the best way to educate people about dental care?

☐ Radio/TV programs ☐ School programs ☐ Community outreach ☐ Religious gatherings ☐ Social media ☐Others ___

Thank You for Your Participation

Your cooperation is greatly appreciated. All responses will remain confidential and used solely for academic research.
